# Supplementary material
Source: PubMed Central journal article supplement (PMC7653614)
Supplement: ajtr0012-6366-f7.pdf [file ajtr0012-6366-f7.pdf]

## Bibliometric analysis of ALI/ARDS

**Supplementary Table 1.** The analytic consequence of 159 keywords with at least 75 occurrence times

| No. | Label                                      | Cluster | Links | Occurrences | Average appearing years (AAY) | Average citations |
|-----|--------------------------------------------|---------|-------|-------------|-------------------------------|-------------------|
| 1   | activation                                 | 2       | 145   | 909         | 2004.2211                     | 14.9021           |
| 2   | acute kidney injury                        | 1       | 112   | 81          | 2015.2469                     | 18.1975           |
| 3   | acute lung injury                          | 2       | 158   | 3696        | 2009.6794                     | 20.1426           |
| 4   | acute lung injury (ali)                    | 2       | 112   | 110         | 2015.6909                     | 11.3364           |
| 5   | acute respiratory distress syndrome        | 1       | 156   | 1387        | 2004.504                      | 16.4037           |
| 6   | acute respiratory distress syndrome (ards) | 1       | 129   | 105         | 2015.4857                     | 10.181            |
| 7   | acute respiratory failure                  | 1       | 89    | 77          | 2014.5974                     | 26.1558           |
| 8   | acute respiratory-distress                 | 1       | 129   | 100         | 1974.4                        | 17.35             |
| 9   | adult                                      | 1       | 108   | 113         | 2014.6195                     | 23.2566           |
| 10  | adult patients                             | 1       | 87    | 75          | 2014.8667                     | 20.1867           |
| 11  | adults                                     | 1       | 103   | 115         | 2014.7217                     | 19.7739           |
| 12  | ali                                        | 2       | 135   | 144         | 2014.8333                     | 14.5417           |
| 13  | alpha                                      | 2       | 103   | 93          | 2014.8387                     | 18.2366           |
| 14  | alveolar fluid clearance                   | 2       | 95    | 87          | 2014.7126                     | 24.5172           |
| 15  | alveolar macrophages                       | 2       | 100   | 131         | 2014.3359                     | 19.0076           |
| 16  | alveolar recruitment                       | 1       | 61    | 76          | 2013.1842                     | 16.9474           |
| 17  | animal-models                              | 2       | 119   | 112         | 2013.9911                     | 14.9554           |
| 18  | apoptosis                                  | 2       | 128   | 465         | 2006.5462                     | 13.686            |
| 19  | ards                                       | 1       | 158   | 1166        | 2011.2316                     | 17.6535           |
| 20  | berlin definition                          | 1       | 114   | 161         | 2016.2609                     | 22.9255           |
| 21  | biomarkers                                 | 1       | 106   | 78          | 2015.7308                     | 16.2564           |
| 22  | bronchoalveolar lavage                     | 3       | 102   | 77          | 2013.5195                     | 12.6753           |
| 23  | cancer                                     | 2       | 113   | 121         | 1998.4793                     | 13.2562           |
| 24  | care                                       | 1       | 115   | 129         | 2016.0388                     | 14.3023           |
| 25  | cells                                      | 2       | 131   | 563         | 2011.4245                     | 14.8082           |
| 26  | children                                   | 1       | 117   | 188         | 2003.7234                     | 19.6117           |
| 27  | clinical-trial                             | 1       | 128   | 163         | 2013.7423                     | 51.4724           |
| 28  | coagulation                                | 2       | 104   | 91          | 2013.2857                     | 20.8791           |
| 29  | consensus conference                       | 1       | 89    | 78          | 2013.5641                     | 26.2692           |
| 30  | corticosteroids                            | 1       | 114   | 98          | 2014.1735                     | 15.2857           |
| 31  | critical illness                           | 1       | 93    | 106         | 2014.1981                     | 36.0283           |
| 32  | critically-ill                             | 1       | 108   | 83          | 2013.3253                     | 31.1928           |
| 33  | critically-ill patients                    | 1       | 124   | 245         | 2005.498                      | 51.2571           |
| 34  | cytokine                                   | 2       | 113   | 132         | 2013.303                      | 19.7955           |
| 35  | cytokines                                  | 2       | 141   | 252         | 2006.1905                     | 14.5437           |
| 36  | damage                                     | 2       | 95    | 76          | 2015.4342                     | 12.5132           |
| 37  | death                                      | 2       | 111   | 78          | 2014.3718                     | 22.8077           |
| 38  | definition                                 | 1       | 106   | 115         | 2015.9565                     | 18.1043           |
| 39  | definitions                                | 1       | 123   | 124         | 2013.0887                     | 31.6855           |
| 40  | diagnosis                                  | 1       | 87    | 84          | 2014.7143                     | 26.5714           |
| 41  | disease                                    | 2       | 149   | 247         | 2014.5304                     | 22.0729           |
| 42  | distress-syndrome                          | 1       | 122   | 170         | 2013.3706                     | 25.1118           |
| 43  | dysfunction                                | 2       | 144   | 202         | 2014.901                      | 19.005            |
| 44  | ecmo                                       | 1       | 84    | 125         | 2015.16                       | 10.632            |
| 45  | end-expiratory pressure                    | 1       | 132   | 437         | 2013.8673                     | 26.0046           |
| 46  | endothelial-cells                          | 2       | 114   | 184         | 2013.8641                     | 20.5326           |

## Bibliometric analysis of ALI/ARDS

|    |                                     |   |     |      |           |         |
|----|-------------------------------------|---|-----|------|-----------|---------|
| 47 | endotoxin                           | 2 | 123 | 228  | 2013.6184 | 17.7193 |
| 48 | epidemiology                        | 1 | 145 | 209  | 2015.488  | 35.9569 |
| 49 | epithelial-cells                    | 2 | 113 | 177  | 2013.8927 | 18.904  |
| 50 | expression                          | 2 | 147 | 1043 | 2009.0451 | 14.6577 |
| 51 | extracorporeal membrane oxygenation | 1 | 99  | 185  | 1993.2432 | 16.1297 |
| 52 | extracorporeal membrane-oxygenation | 1 | 90  | 113  | 2015.5044 | 15.5398 |
| 53 | factor-kappa-b                      | 2 | 90  | 80   | 1988.575  | 16.9375 |
| 54 | failure                             | 1 | 144 | 465  | 2010.0495 | 23.8086 |
| 55 | fibrosis                            | 2 | 105 | 128  | 2014.8828 | 13.3438 |
| 56 | gas-exchange                        | 1 | 97  | 97   | 2012.9897 | 15.8247 |
| 57 | gene                                | 2 | 97  | 81   | 2014.2222 | 15.3704 |
| 58 | gene-expression                     | 2 | 108 | 183  | 2013.9727 | 20.6557 |
| 59 | hyperoxia                           | 2 | 96  | 94   | 2014.2021 | 18.5851 |
| 60 | identification                      | 2 | 113 | 101  | 2014.5644 | 22.2673 |
| 61 | impact                              | 1 | 101 | 79   | 2015.1013 | 27.6076 |
| 62 | in-vitro                            | 2 | 126 | 237  | 2014.4515 | 18.8312 |
| 63 | in-vivo                             | 2 | 123 | 251  | 2013.5578 | 25.4502 |
| 64 | induction                           | 2 | 101 | 130  | 1999.2769 | 15.0308 |
| 65 | infection                           | 1 | 133 | 177  | 2002.8927 | 51.7006 |
| 66 | inflammation                        | 2 | 155 | 1555 | 2007.3158 | 14.9659 |
| 67 | inflammatory response               | 2 | 132 | 186  | 2014.9892 | 12.8387 |
| 68 | inflammatory responses              | 2 | 97  | 77   | 1988.1039 | 34.013  |
| 69 | inhibition                          | 2 | 128 | 413  | 2010.1792 | 13.6634 |
| 70 | injury                              | 1 | 156 | 517  | 2010.3346 | 19.1857 |
| 71 | intensive-care                      | 1 | 94  | 117  | 2014.9573 | 19.1624 |
| 72 | intensive-care-unit                 | 1 | 105 | 168  | 2013.7381 | 69.631  |
| 73 | ischemia-reperfusion                | 2 | 97  | 80   | 2014.325  | 12.0125 |
| 74 | ischemia-reperfusion injury         | 2 | 102 | 119  | 1996.7563 | 16.8067 |
| 75 | kappa-b                             | 2 | 89  | 128  | 1999.1875 | 14.8594 |
| 76 | kinase                              | 2 | 94  | 90   | 2014.9444 | 17.9111 |
| 77 | life-support                        | 1 | 81  | 102  | 2014.6667 | 36.5392 |
| 78 | lipopolysaccharide                  | 2 | 138 | 642  | 1999.1059 | 15.4611 |
| 79 | lps                                 | 2 | 109 | 258  | 2015.376  | 14.1047 |
| 80 | lung                                | 2 | 146 | 213  | 2013.5493 | 16.6901 |
| 81 | lung injury                         | 2 | 156 | 504  | 2006.8591 | 12.9901 |
| 82 | macrophages                         | 2 | 122 | 304  | 2014.9671 | 19.7434 |
| 83 | management                          | 1 | 133 | 207  | 1995.3237 | 13.9179 |
| 84 | mechanical ventilation              | 1 | 158 | 870  | 2009.4103 | 24.8874 |
| 85 | mechanism                           | 2 | 104 | 87   | 1992.4023 | 13.8391 |
| 86 | mechanisms                          | 2 | 149 | 366  | 2014.623  | 15.2186 |
| 87 | metaanalysis                        | 1 | 110 | 116  | 2014.9828 | 24.6983 |
| 88 | mice                                | 2 | 142 | 731  | 2006.6867 | 16.2654 |
| 89 | model                               | 2 | 152 | 434  | 2005.2811 | 13.371  |
| 90 | mortality                           | 1 | 158 | 799  | 2012.567  | 23.7359 |
| 91 | multicenter                         | 1 | 100 | 105  | 2015.0762 | 26.3048 |
| 92 | necrosis-factor-alpha               | 2 | 97  | 79   | 2013.0759 | 19.5316 |
| 93 | neutrophil                          | 2 | 111 | 116  | 1996.9138 | 16.3879 |
| 94 | neutrophils                         | 2 | 126 | 248  | 1998.0847 | 17.0565 |
| 95 | nf-kappa b                          | 2 | 101 | 197  | 1995.4315 | 13.0914 |

## Bibliometric analysis of ALI/ARDS

|     |                               |   |     |      |           |         |
|-----|-------------------------------|---|-----|------|-----------|---------|
| 96  | nf-kappa-b                    | 2 | 120 | 492  | 2011.1951 | 14.6911 |
| 97  | nitric-oxide                  | 2 | 125 | 184  | 2013.8533 | 14.7609 |
| 98  | nitric-oxide synthase         | 2 | 105 | 149  | 2013.0268 | 18.4966 |
| 99  | outcomes                      | 1 | 146 | 503  | 2014.4751 | 33.4732 |
| 100 | oxidative stress              | 2 | 136 | 518  | 2003.5772 | 12.9595 |
| 101 | oxygenation                   | 1 | 118 | 116  | 2013.9741 | 14.3707 |
| 102 | pathogenesis                  | 2 | 141 | 254  | 2006.7559 | 17.0748 |
| 103 | pathophysiology               | 2 | 107 | 82   | 2014.4512 | 12.9268 |
| 104 | pathway                       | 2 | 113 | 232  | 2007.0431 | 11.7284 |
| 105 | peep                          | 1 | 66  | 78   | 2014.0385 | 13.1154 |
| 106 | permeability                  | 2 | 124 | 195  | 2003.7641 | 18.3128 |
| 107 | plasma                        | 1 | 107 | 123  | 2013.8049 | 25.9268 |
| 108 | pneumonia                     | 1 | 146 | 243  | 2013.893  | 17.8724 |
| 109 | pressure                      | 1 | 120 | 160  | 2014.6    | 38.1313 |
| 110 | prevention                    | 1 | 126 | 86   | 2014.5465 | 17.4651 |
| 111 | prognosis                     | 1 | 104 | 80   | 1964.45   | 27.325  |
| 112 | prone position                | 1 | 78  | 80   | 2014.3875 | 12.6125 |
| 113 | protects                      | 2 | 101 | 155  | 2016.4645 | 9.329   |
| 114 | protein                       | 2 | 116 | 147  | 2014.7007 | 18.6259 |
| 115 | pulmonary                     | 1 | 148 | 213  | 2014.2676 | 17.7606 |
| 116 | pulmonary edema               | 2 | 116 | 96   | 2013.2917 | 28.0938 |
| 117 | pulmonary-edema               | 1 | 143 | 168  | 2001.1964 | 24.2738 |
| 118 | pulmonary-fibrosis            | 2 | 95  | 90   | 2013.7556 | 21.8556 |
| 119 | quality-of-life               | 1 | 72  | 81   | 2013.7037 | 45.9136 |
| 120 | randomized controlled-trial   | 1 | 123 | 221  | 2013.276  | 39.5882 |
| 121 | rat                           | 2 | 100 | 98   | 2013.5204 | 11.9184 |
| 122 | rats                          | 2 | 125 | 290  | 2007.4276 | 13.5724 |
| 123 | receptor                      | 2 | 133 | 202  | 2015.0396 | 18.3218 |
| 124 | recruitment                   | 1 | 140 | 243  | 2005.9753 | 25.9218 |
| 125 | release                       | 2 | 105 | 80   | 2014.3    | 14.975  |
| 126 | repair                        | 2 | 92  | 80   | 1988.6875 | 26.0875 |
| 127 | resolution                    | 2 | 104 | 128  | 1999.9844 | 16.7656 |
| 128 | respiratory distress syndrome | 1 | 122 | 116  | 2014.6466 | 18.3793 |
| 129 | respiratory failure           | 1 | 94  | 98   | 2013.9286 | 12.3673 |
| 130 | respiratory-distress-syndrome | 2 | 156 | 2301 | 2011.3585 | 22.2634 |
| 131 | responses                     | 2 | 109 | 133  | 1999.5789 | 14.9925 |
| 132 | risk                          | 1 | 117 | 179  | 2015.2011 | 16.2737 |
| 133 | risk-factors                  | 1 | 116 | 155  | 1988.6065 | 20.2774 |
| 134 | score                         | 1 | 84  | 77   | 2015.5584 | 18.0909 |
| 135 | sepsis                        | 2 | 153 | 749  | 2004.0801 | 22.6756 |
| 136 | septic shock                  | 1 | 145 | 270  | 2014.2222 | 37.037  |
| 137 | severe sepsis                 | 1 | 135 | 173  | 2013.5549 | 57.8497 |
| 138 | severity                      | 1 | 118 | 103  | 2014.165  | 25.9903 |
| 139 | shock                         | 4 | 134 | 113  | 2013.6283 | 15.7965 |
| 140 | strategy                      | 1 | 100 | 125  | 2013.024  | 39.848  |
| 141 | stress                        | 2 | 116 | 106  | 1995.6132 | 13.8396 |
| 142 | stromal cells                 | 2 | 86  | 87   | 2015.4828 | 29.8966 |
| 143 | support                       | 1 | 75  | 78   | 2015.0769 | 17.8205 |
| 144 | surfactant                    | 1 | 123 | 100  | 2013.27   | 15.92   |

## Bibliometric analysis of ALI/ARDS

|     |                                |   |     |     |           |         |
|-----|--------------------------------|---|-----|-----|-----------|---------|
| 145 | survival                       | 1 | 151 | 232 | 2015.056  | 23.7198 |
| 146 | therapy                        | 1 | 145 | 238 | 2014.7185 | 21.979  |
| 147 | tidal volume                   | 1 | 119 | 168 | 2013.5893 | 22.4405 |
| 148 | tidal volumes                  | 1 | 99  | 93  | 2013.7097 | 20.7312 |
| 149 | tnf-alpha                      | 2 | 118 | 203 | 2004.6355 | 15.0493 |
| 150 | trali                          | 1 | 68  | 115 | 2012.9652 | 20.3043 |
| 151 | transfusion                    | 1 | 89  | 88  | 2013.5341 | 17.6591 |
| 152 | transplantation                | 2 | 113 | 95  | 1992.6    | 16.7158 |
| 153 | trauma                         | 1 | 117 | 101 | 2014.5248 | 13.198  |
| 154 | trial                          | 1 | 115 | 154 | 2013.8182 | 18.7857 |
| 155 | tumor-necrosis-factor          | 2 | 108 | 146 | 2012.8014 | 19.2671 |
| 156 | united-states                  | 1 | 98  | 75  | 2014.16   | 30.16   |
| 157 | ventilation                    | 1 | 152 | 427 | 2014.363  | 19.918  |
| 158 | ventilator-induced lung injury | 1 | 127 | 124 | 2014.0242 | 23.1935 |
| 159 | volume                         | 1 | 80  | 89  | 2014.5843 | 16.6742 |
